# Supplementary material
Source: ML conference proceedings conference paper supplement (https://proceedings.neurips.cc/paper_files/paper/2009/hash/9c838d2e45b2ad1094d42f4ef36764f6-Abstract.html)
Supplement: Supplementary file [file 9c838d2e45b2ad1094d42f4ef36764f6-Supplemental.zip]

---

# Data-driven calibration of linear estimators with minimal penalties: Appendix

---

**Sylvain Arlot** \*

CNRS ; Willow Project-Team  
Laboratoire d'Informatique de  
l'Ecole Normale Supérieure  
(CNRS/ENS/INRIA UMR 8548)  
23, avenue d'Italie, F-75013 Paris, France  
sylvain.arlot@ens.fr

**Francis Bach** †

INRIA ; Willow Project-Team  
Laboratoire d'Informatique de  
l'Ecole Normale Supérieure  
(CNRS/ENS/INRIA UMR 8548)  
23, avenue d'Italie, F-75013 Paris, France  
francis.bach@ens.fr

This appendix is mainly devoted to the proof of Theorem 1 in [1], which is splitted into two results. First, Proposition 1 shows that  $n^{-1}\sigma^2(2\text{tr}(A_\lambda) - \text{tr}(A_\lambda^\top A_\lambda))$  is a minimal penalty, so that  $\hat{C}$  defined in the Algorithm of Section 4.1 in [1] consistently estimates  $\sigma^2$ . Second, Proposition 2 shows that penalizing the empirical risk with  $2\hat{C}\text{tr}(A_\lambda)n^{-1}$  and  $\hat{C} \approx \sigma^2$  leads to an oracle inequality. Proving Theorem 1 in [1] is straightforward by combining Propositions 1 and 2.

In Section 1, we introduce some notation and make some computations that will be used in the following. Proposition 1 is proved in Section 2. Proposition 2 is proved in Section 3. Concentration inequalities needed for proving Propositions 1 and 2 are stated and proved in Section 4. Computations specific to the kernel ridge regression example are made in Section 5.

## 1 Notation and first computations

Recall that

$$Y = F + \varepsilon$$

where  $F = (f(x_i))_{1 \leq i \leq n} \in \mathbb{R}^n$  is deterministic,  $\varepsilon = (\varepsilon_i)_{1 \leq i \leq n} \in \mathbb{R}^n$  is centered with covariance matrix  $\sigma^2 I_n$  and  $I_n$  is the  $n \times n$  identity matrix. For every  $\lambda \in \Lambda$ ,  $\hat{F}_\lambda = A_\lambda Y$  for some  $n \times n$  real-valued matrix  $A_\lambda$ , so that

$$\|\hat{F}_\lambda - F\|_2^2 = \|(A_\lambda - I_n)F\|_2^2 + \|A_\lambda \varepsilon\|_2^2 + 2\langle A_\lambda \varepsilon, (A_\lambda - I_n)F \rangle, \quad (1)$$

$$\|\hat{F}_\lambda - Y\|_2^2 = \|\hat{F}_\lambda - F\|_2^2 + \|\varepsilon\|_2^2 - 2\langle \varepsilon, A_\lambda \varepsilon \rangle + 2\langle \varepsilon, (I_n - A_\lambda)F \rangle, \quad (2)$$

where  $\forall t, u \in \mathbb{R}^n$ ,  $\langle t, u \rangle = \sum_{i=1}^n t_i u_i$  and  $\|t\|_2^2 = \langle t, t \rangle$ .

Now, define, for every  $\lambda \in \Lambda$ ,

$$\begin{aligned} b(\lambda) &= \|(A_\lambda - I_n)F\|_2^2 \\ v_1(\lambda) &= \text{tr}(A_\lambda)\sigma^2 \\ \delta_1(\lambda) &= \langle \varepsilon, A_\lambda \varepsilon \rangle - \text{tr}(A_\lambda)\sigma^2 \\ v_2(\lambda) &= \text{tr}(A_\lambda^\top A_\lambda)\sigma^2 \\ \delta_2(\lambda) &= \|A_\lambda \varepsilon\|_2^2 - \text{tr}(A_\lambda^\top A_\lambda)\sigma^2 \\ \delta_3(\lambda) &= 2\langle A_\lambda \varepsilon, (A_\lambda - I_n)F \rangle \\ \delta_4(\lambda) &= 2\langle \varepsilon, (I_n - A_\lambda)F \rangle, \end{aligned}$$

---

\*<http://www.di.ens.fr/~arlot/>

†<http://www.di.ens.fr/~fbach/>

so that Eq. (1) and (2) can be rewritten

$$\left\| \widehat{F}_\lambda - F \right\|_2^2 = b(\lambda) + v_2(\lambda) + \delta_2(\lambda) + \delta_3(\lambda) \quad (3)$$

$$\left\| \widehat{F}_\lambda - Y \right\|_2^2 = \left\| \widehat{F}_\lambda - F \right\|_2^2 - 2v_1(\lambda) - 2\delta_1(\lambda) + \delta_4(\lambda) + \|\varepsilon\|_2^2 . \quad (4)$$

Note that  $b(\lambda)$ ,  $v_1(\lambda)$  and  $v_2(\lambda)$  are deterministic, and for all  $\lambda \in \Lambda$ , all  $\delta_i(\lambda)$  are random with zero mean. In particular, we deduce the following expressions of the risk and the empirical risk of  $\widehat{F}_\lambda$ :

$$\mathbb{E} \left[ n^{-1} \left\| \widehat{F}_\lambda - F \right\|_2^2 \right] = n^{-1} \left\| (A_\lambda - I_n) F \right\|_2^2 + \frac{\text{tr}(A_\lambda^\top A_\lambda) \sigma^2}{n} , \quad (5)$$

$$\mathbb{E} \left[ n^{-1} \left\| \widehat{F}_\lambda - Y \right\|_2^2 \right] - \sigma^2 = n^{-1} \left\| (A_\lambda - I_n) F \right\|_2^2 - \frac{(2 \text{tr}(A_\lambda) - \text{tr}(A_\lambda^\top A_\lambda)) \sigma^2}{n} . \quad (6)$$

Define

$$\|A_\lambda\| := \max \text{Sp}(A_\lambda) = \sup_{t \in \mathbb{R}^n, t \neq 0} \left\{ \frac{\|A_\lambda t\|_2}{\|t\|_2} \right\} .$$

Since  $\text{tr}(A_\lambda) \leq \sqrt{n \text{tr}(A_\lambda^\top A_\lambda)}$ , we have

$$v_1(\lambda) \leq \sigma \sqrt{nv_2(\lambda)} . \quad (7)$$

In addition, if  $A_\lambda$  has a spectrum  $\text{Sp}(A_\lambda) \subset [0, 1]$ , then

$$0 \leq \text{tr}(A_\lambda^\top A_\lambda) \leq \text{tr}(A_\lambda) \leq 2 \text{tr}(A_\lambda) - \text{tr}(A_\lambda^\top A_\lambda) \leq 2 \text{tr}(A_\lambda) ,$$

so that

$$0 \leq v_2(\lambda) \leq v_1(\lambda) \leq 2v_1(\lambda) - v_2(\lambda) \leq 2v_1(\lambda) . \quad (8)$$

## 2 Minimal penalty

Define

$$\forall C \geq 0, \quad \widehat{\lambda}_0(C) \in \arg \min_{\lambda \in \Lambda} \left\{ \left\| \widehat{F}_\lambda - Y \right\|_2^2 + C (2 \text{tr}(A_\lambda) - \text{tr}(A_\lambda^\top A_\lambda)) \right\} . \quad (9)$$

We will prove the following proposition in this section.

**Proposition 1** *Let  $\widehat{\lambda}_0$  be defined by Eq. (9). Assume that  $\forall \lambda \in \Lambda$ ,  $A_\lambda$  is symmetric with  $\text{Sp}(A_\lambda) \subset [0, 1]$ , that  $\varepsilon_i$  are i.i.d. Gaussian with zero mean and variance  $\sigma^2 > 0$ , and that*

$$\exists \lambda_1 \in \Lambda, \quad \text{df}(\lambda_1) \geq \frac{n}{2} \quad \text{and} \quad b(\lambda_1) \leq \sigma^2 \sqrt{n \ln(n)} \quad (\mathbf{A}_1)$$

$$\exists \lambda_2 \in \Lambda, \quad \text{df}(\lambda_2) \leq \sqrt{n} \quad \text{and} \quad b(\lambda_2) \leq \sigma^2 \sqrt{n \ln(n)} . \quad (\mathbf{A}_2)$$

*Then, a numerical constant  $C_1 > 0$  exists such that for every  $n \geq C_1$ , for every  $\gamma \geq 1$ ,*

$$\forall 0 \leq C < \left( 1 - 91\gamma \sqrt{\frac{\ln(n)}{n}} \right) \sigma^2, \quad \text{df}(\widehat{\lambda}_0(C)) \geq \frac{n}{10} \quad (10)$$

$$\text{and} \quad \forall C > \left( 1 + \frac{44\gamma \sqrt{\ln(n)}}{n^{1/4}} \right) \sigma^2, \quad \text{df}(\widehat{\lambda}_0(C)) \leq n^{3/4} \quad (11)$$

*hold with probability at least  $1 - 8 \text{Card}(\Lambda) n^{-\gamma}$ .*

If  $\text{Card}(\Lambda) \leq K n^\alpha$ , Proposition 1 with  $\gamma = \alpha + 2$  proves that with probability at least  $1 - 8K n^{-2}$ ,  $\widehat{C}$  defined in the Algorithm of Section 4.1 in [1] exists and

$$\left( 1 - 91(\alpha + 2) \sqrt{\frac{\ln(n)}{n}} \right) \sigma^2 \leq \widehat{C} \leq \left( 1 + \frac{44(\alpha + 2) \sqrt{\ln(n)}}{n^{1/4}} \right) \sigma^2 .$$

**Remark 1** If  $(\mathbf{A}_1)$  is replaced by

$$\exists \lambda_1 \in \Lambda, \quad \text{df}(\lambda_1) \geq a_n \quad \text{and} \quad b(\lambda_1) \leq \sigma^2 \beta_n \quad (\mathbf{A}'_1)$$

for some  $a_n \geq \ln(n)$  and  $\beta_n \geq 0$ , then Proposition 1 still holds with Eq. (10) replaced by

$$\forall 0 \leq C < \left( 1 - \frac{3\beta_n}{a_n} - 62\gamma \sqrt{\frac{\ln(n)}{a_n}} \right) \sigma^2, \quad \text{df}(\hat{\lambda}_0(C)) \geq \frac{a_n}{5}. \quad (12)$$

**Remark 2** If  $(\mathbf{A}_2)$  is replaced by

$$\exists \lambda_2 \in \Lambda, \quad \text{df}(\lambda_2) \leq n^a \quad \text{and} \quad b(\lambda_2) \leq \sigma^2 \beta'_n \quad (\mathbf{A}'_2)$$

for some  $a \in [1/2, 1)$  and  $\beta'_n \geq \sqrt{n \ln(n)}$ , then for every  $\beta \in (a, 1)$  Proposition 1 still holds for  $n \geq \max \{ C_1, 4^{1/(\beta-a)} \}$  with Eq. (11) replaced by

$$\forall C > (1 + 44\gamma\beta'_n n^{-\beta}) \sigma^2, \quad \text{df}(\hat{\lambda}_0(C)) \leq n^\beta. \quad (13)$$

**Remark 3** On the event defined in Proposition 1, we can derive from Eq. (3), (39), (48), and  $\|A_\lambda\| \leq 1$ , that

$$\forall \lambda \in \Lambda \text{ such that } \text{df}(\lambda) \geq \frac{n}{\ln(n)}, \quad n^{-1} \left\| \hat{F}_\lambda - F \right\|_2^2 \geq \left( \frac{1}{2\ln(n)} - \frac{8\gamma \ln(n)}{n} \right) \sigma^2.$$

Hence, the blow up of  $\text{df}(\hat{\lambda}_0(C))$  holding when the penalty is below the minimal penalty also implies a blow up of the risk  $n^{-1} \left\| \hat{F}_{\hat{\lambda}_0(C)} - F \right\|_2^2$ .

Let us now prove Proposition 1.

## 2.1 General starting point

Combining Eq. (9) with Eq. (3) and (4), for every  $C \geq 0$ ,  $\hat{\lambda}_0(C)$  also minimizes over  $\lambda \in \Lambda$

$$\begin{aligned} \text{crit}_C(\lambda) &:= \left\| \hat{F}_\lambda - Y \right\|_2^2 - \|\varepsilon\|_2^2 + C (2 \text{tr}(A_\lambda) - \text{tr}(A_\lambda^\top A_\lambda)) \\ &= b(\lambda) + (\sigma^{-2}C - 1) (2v_1(\lambda) - v_2(\lambda)) - 2\delta_1(\lambda) + \delta_2(\lambda) + \delta_3(\lambda) + \delta_4(\lambda). \end{aligned}$$

We now use the concentration inequalities of Eq. (39), (40), (47) and (48) proved in Section 4: For every  $\lambda \in \Lambda$  and  $x \geq 1$ , an event of probability  $1 - 8e^{-x}$  exists on which for every  $C \geq 0$  and  $\theta > 0$ ,

$$\text{crit}_C(\lambda) \geq \frac{b(\lambda)}{3} + (\sigma^{-2}C - 1)(2v_1(\lambda) - v_2(\lambda)) - 3\theta v_1(\lambda) - 6(2 + \theta^{-1})x\sigma^2 \quad (14)$$

$$\text{crit}_C(\lambda) \leq \frac{5b(\lambda)}{3} + (\sigma^{-2}C - 1)(2v_1(\lambda) - v_2(\lambda)) + 3\theta v_1(\lambda) + 6(2 + \theta^{-1})x\sigma^2, \quad (15)$$

using also that  $v_2 \leq v_1$  by Eq. (8) and that  $\|A_\lambda\| \leq 1$ .

For every  $x \geq 1$ , let  $\Omega_x$  be the event on which the inequalities appearing in Eq. (39), (40), (47) and (48) hold for every  $\theta > 0$  and  $\lambda \in \Lambda$ . The union bound shows that  $\mathbb{P}(\Omega_x) \geq 1 - 8 \text{Card}(\Lambda)e^{-x}$ .

## 2.2 Below the minimal penalty

We assume in this subsection that  $C \in [0, \sigma^2)$ . We will prove Eq. (12) using assumption  $(\mathbf{A}'_1)$ , since when  $a_n = n/2$  and  $\beta_n = \sqrt{n \ln(n)}$ , Eq. (12) is Eq. (10) and  $(\mathbf{A}'_1)$  is  $(\mathbf{A}_1)$ .

Using Eq. (8) and taking  $\theta = \sqrt{x/\text{df}(\lambda)}$  in Eq. (14) and (15), we get that for every  $x \geq 1$ , on  $\Omega_x$ , for every  $\lambda \in \Lambda$ ,

$$\text{crit}_C(\lambda) \geq \frac{b(\lambda)}{3} + 2(C - \sigma^2) \text{df}(\lambda) - \left( 9\sqrt{x \text{df}(\lambda)} + 12x \right) \sigma^2 \quad (16)$$

$$\text{crit}_C(\lambda) \leq \frac{5b(\lambda)}{3} + (C - \sigma^2) \text{df}(\lambda) + \left( 9\sqrt{x \text{df}(\lambda)} + 12x \right) \sigma^2. \quad (17)$$

Let  $\lambda \in \Lambda$ . Two cases can be distinguished:

1. If  $\text{df}(\lambda) < a_n/5$ , then Eq. (16) implies

$$\text{crit}_C(\lambda) \geq \frac{2(C - \sigma^2)a_n}{5} - \left(9\sqrt{\frac{xa_n}{5}} + 12x\right) \sigma^2. \quad (18)$$

2. If  $\text{df}(\lambda) \geq a_n$ , then Eq. (17) implies

$$\text{crit}_C(\lambda) \leq \frac{5b(\lambda)}{3} + (C - \sigma^2)a_n + (9\sqrt{xa_n} + 12x) \sigma^2. \quad (19)$$

We now take  $x = \gamma \ln(n)$  so that  $\mathbb{P}(\Omega_x) \geq 1 - 8 \text{Card}(\Lambda) n^{-\gamma}$ .

On the one hand, Eq. (18) implies

$$\inf_{\lambda \in \Lambda, \text{df}(\lambda) < a_n/5} \{\text{crit}_C(\lambda)\} \geq \frac{2(C - \sigma^2)a_n}{5} - \left(9\sqrt{\frac{\gamma a_n \ln(n)}{5}} + 12\gamma \ln(n)\right) \sigma^2. \quad (20)$$

On the other hand, for  $\lambda = \lambda_1$  given by assumption  $(\mathbf{A}'_1)$ , Eq. (19) implies

$$\text{crit}_C(\lambda_1) \leq \frac{5\sigma^2\beta_n}{3} + (C - \sigma^2)a_n + \left(9\sqrt{\gamma a_n \ln(n)} + 12\gamma \ln(n)\right) \sigma^2. \quad (21)$$

Comparing Eq. (20) and Eq. (21), we get that

$$\text{crit}_C(\lambda_1) < \inf_{\lambda \in \Lambda, \text{df}(\lambda) < a_n/5} \{\text{crit}_C(\lambda)\}$$

hence  $\text{df}(\hat{\lambda}_0(C)) \geq a_n/5$  if

$$1 - \sigma^{-2}C > \frac{3\beta_n}{a_n} + 62\gamma\sqrt{\frac{\ln(n)}{a_n}}.$$

### 2.3 Above the minimal penalty

We assume in this subsection that  $C > \sigma^2$ . We will prove Eq. (13) using assumption  $(\mathbf{A}'_2)$ , since when  $a = 1/2$ ,  $\beta'_n = \sqrt{n \ln(n)}$  and  $\beta = (1 + a)/2 = 3/4$ , Eq. (13) is Eq. (11) and  $(\mathbf{A}'_2)$  is  $(\mathbf{A}_2)$ .

Using Eq. (8) and taking  $\theta = \sqrt{x/\text{df}(\lambda)}$  in Eq. (14) and (15), we get that for every  $x \geq 1$ , on  $\Omega_x$ , for every  $\lambda \in \Lambda$ ,

$$\text{crit}_C(\lambda) \geq \frac{b(\lambda)}{3} + (C - \sigma^2) \text{df}(\lambda) - \left(9\sqrt{x \text{df}(\lambda)} + 12x\right) \sigma^2 \quad (22)$$

$$\text{crit}_C(\lambda) \leq \frac{5b(\lambda)}{3} + 2(C - \sigma^2) \text{df}(\lambda) + \left(9\sqrt{x \text{df}(\lambda)} + 12x\right) \sigma^2. \quad (23)$$

Let  $\lambda \in \Lambda$ , and  $\beta \in (a, 1)$ . As in Section 2.2, we consider two cases.

1. If  $\text{df}(\lambda) \leq n^a$ , Eq. (23) implies

$$\text{crit}_C(\lambda) \leq 2b(\lambda) + 2(C - \sigma^2)n^a + \left(9\sqrt{xn^a} + 12x\right) \sigma^2. \quad (24)$$

2. If  $\text{df}(\lambda) \geq n^\beta$ , Eq. (22) implies

$$\text{crit}_C(\lambda) \geq (C - \sigma^2)n^\beta - \left(9\sqrt{xn^\beta} + 12x\right) \sigma^2. \quad (25)$$

We now take  $x = \gamma \ln(n)$  as in Section 2.2.

On the one hand, for  $\lambda = \lambda_2$  given by assumption  $(\mathbf{A}'_2)$ , Eq. (24) implies

$$\text{crit}_C(\lambda_2) \leq 2\sigma^2\beta'_n + (C - \sigma^2)\frac{n^\beta}{2} + \left(9\sqrt{\gamma \ln(n)n^a} + 12\gamma \ln(n)\right) \sigma^2 \quad (26)$$

if  $n^{\beta-a} \geq 4$ .

On the other hand, Eq. (25) implies

$$\inf_{\lambda \in \Lambda, \text{df}(\lambda) \geq n^\beta} \{ \text{crit}_C(\lambda) \} \geq (C - \sigma^2)n^\beta - \left( 9\sqrt{\gamma \ln(n)n^\beta} + 12\gamma \ln(n) \right) \sigma^2. \quad (27)$$

Comparing Eq. (26) and Eq. (27), we get that

$$\text{crit}_C(\lambda_2) < \inf_{\lambda \in \Lambda, \text{df}(\lambda) \geq n^\beta} \{ \text{crit}_C(\lambda) \}$$

hence  $\text{df}(\hat{\lambda}_0(C)) < n^\beta$  if

$$n \geq 4^{1/(\beta-a)}, \quad \sqrt{n/\ln(n)} \geq 12, \quad \text{and} \quad \sigma^{-2}C - 1 > 44\gamma\beta'_n n^{-\beta}.$$

■

### 3 Oracle inequality

Define

$$\forall C \geq 0, \quad \hat{\lambda}_{\text{opt}}(C) \in \arg \min_{\lambda \in \Lambda} \left\{ \left\| \hat{F}_\lambda - Y \right\|_2^2 + 2C \text{tr}(A_\lambda) \right\}. \quad (28)$$

We will prove the following proposition in this section.

**Proposition 2** *Let  $\hat{\lambda}_{\text{opt}}$  be defined by Eq. (28). Assume that  $\forall \lambda \in \Lambda$ ,  $A_\lambda$  is symmetric with  $\text{Sp}(A_\lambda) \subset [0, 1]$ , that  $\varepsilon_i$  are i.i.d. Gaussian with zero mean and variance  $\sigma^2 > 0$ .*

*Then, a numerical constant  $C_2 > 0$  exists such that for every  $n \geq C_2$ ,  $\gamma \geq 1$ ,  $\eta^+ \geq (\ln(n))^{-1}$ , and  $C > 0$  such that  $\sigma^{-2}C \in \left[ 1 + (\ln(n))^{-1}, 1 + \eta^+ \right]$ ,*

$$n^{-1} \left\| \hat{F}_{\hat{\lambda}_{\text{opt}}(C)} - F \right\|_2^2 \leq \left( 1 + \frac{3}{\ln(n)} \right) \inf_{\lambda \in \Lambda} \left\{ n^{-1} \left\| \hat{F}_\lambda - F \right\|_2^2 + 4\eta^+ \frac{\sigma^2 \text{tr}(A_\lambda)}{n} \right\} + \frac{14\gamma (\ln(n))^2 \sigma^2}{n}. \quad (29)$$

*holds with probability at least  $1 - 8 \text{Card}(\Lambda)n^{-\gamma}$ .*

*If in addition*

$$\exists \kappa \geq 1, \forall \lambda \in \Lambda, \quad v_1(\lambda) \leq \kappa \left( v_2(\lambda) + b(\lambda) + (\ln(n))^2 \sigma^2 \right), \quad (\mathbf{A}'_3)$$

*then a constant  $C_3 > 0$  depending only on  $\kappa$  exists such that for every  $n \geq C_3$ ,  $\gamma \geq 1$ , and  $C > 0$  such that  $\sigma^{-2}C \in \left[ 1 - (\ln(n))^{-1}, 1 + (\ln(n))^{-1} \right]$ ,*

$$n^{-1} \left\| \hat{F}_{\hat{\lambda}_{\text{opt}}(C)} - F \right\|_2^2 \leq \left( 1 + \frac{40\kappa}{\ln(n)} \right) \inf_{\lambda \in \Lambda} \left\{ n^{-1} \left\| \hat{F}_\lambda - F \right\|_2^2 \right\} + \frac{36(\kappa + \gamma) \ln(n) \sigma^2}{n} \quad (30)$$

*holds with probability at least  $1 - 8 \text{Card}(\Lambda)n^{-\gamma}$ .*

If  $\text{Card}(\Lambda) \leq Kn^\alpha$ , Proposition 2 with  $\gamma = \alpha + 2$  proves that with probability at least  $1 - 8Kn^{-2}$ ,  $\hat{\lambda}$  defined in the Algorithm of Section 4.1 in [1] satisfies an oracle inequality if assumption  $(\mathbf{A}'_3)$  holds.

**Remark 4** *Assumption  $(\mathbf{A}'_3)$  holds as soon as  $(\mathbf{A}_3)$  holds, i.e.,*

$$\mathbb{E} \left[ n^{-1} \left\| \hat{F}_\lambda - F \right\|_2^2 \right] = n^{-1} (v_2(\lambda) + b(\lambda)) \geq \kappa^{-1} \frac{\sigma^2 \text{tr}(A_\lambda)}{n},$$

*which is the parametric rate of estimation in a model of dimension  $\text{tr}(A_\lambda)$ .*

*In the ordinary least-squares regression example, where all  $A_\lambda$  are projection matrices, assumption  $(\mathbf{A}_3)$  always holds with  $\kappa = 1$  because  $v_1(\lambda) = v_2(\lambda)$ .*

In the kernel ridge regression example, a sufficient condition for  $(\mathbf{A}_3)$  is that the eigenvalues  $(\mu_j)_{1 \leq j \leq n}$  of the kernel matrix  $K$  satisfy

$$\exists \alpha, L_1, L_2 > 0, \forall 1 \leq j \leq n, \quad L_1 j^{-\alpha} \leq \mu_j \leq L_2 j^{-\alpha},$$

which is a classical assumption in kernel ridge regression with a random design; see Section 5.2 for details.

**Remark 5** When  $\text{tr}(A_\lambda^\top A_\lambda) \ll \text{tr}(A_\lambda)$  for most  $\lambda \in \Lambda$ , taking  $C$  slightly larger than  $\sigma^2$  as in the first part of Proposition 2 is necessary to obtain an oracle inequality. Indeed, Proposition 1 then shows that

$$(2 \text{tr}(A_\lambda) - \text{tr}(A_\lambda^\top A_\lambda)) \sigma^2 n^{-1} \approx 2 \text{tr}(A_\lambda) \sigma^2 n^{-1}$$

is a minimal penalty. So, any underestimation of the constant  $C$  in the penalty  $2C \text{tr}(A_\lambda) n^{-1}$  may lead to selecting  $\hat{\lambda} = \hat{\lambda}_{\text{opt}}(C)$  with  $\text{df}(\hat{\lambda}) \geq n/(\ln(n))$ .

Such a phenomenon holds for instance when  $A_\lambda = \lambda I_n$  and  $\Lambda \subset [0, 1]$ , since  $\text{tr}(A_\lambda^\top A_\lambda) = \text{tr}(A_\lambda)^2 n^{-1} \ll \text{tr}(A_\lambda)$  unless  $\text{tr}(A_\lambda) \propto n$ .

**Remark 6** The remainder terms in Eq. (29) and (30),  $14\gamma(\ln(n))^2 \sigma^2 n^{-1}$  and  $36(\kappa + \gamma) \ln(n) \sigma^2 n^{-1}$ , are negligible in front of the risk of the oracle provided that  $v_2(\lambda^*)$  tends to grow with  $n$  faster than  $(\ln(n))^2$ , since the risk of  $\hat{F}_{\lambda^*}$  is at least of order  $v_2(\lambda^*) n^{-1}$ . This usually holds when the bias is not exactly zero for some  $\lambda \in \Lambda$  with  $\text{tr}(A_\lambda^\top A_\lambda)$  too small, as often assumed in the model selection literature for proving asymptotic optimality results.

Let us now prove Proposition 2.

### 3.1 General starting point

Combining Eq. (4) and (28), we obtain that for every  $C > 0$  such that  $\sigma^{-2}C \in [1 - \eta^-, 1 + \eta^+]$  and every  $\lambda \in \Lambda$ ,

$$\begin{aligned} & \left\| \hat{F}_{\hat{\lambda}_{\text{opt}}(C)} - F \right\|_2^2 - 2\eta^- v_1(\hat{\lambda}_{\text{opt}}(C)) + \hat{\Delta}(\hat{\lambda}_{\text{opt}}(C)) \\ & \leq \inf_{\lambda \in \Lambda} \left\{ \left\| \hat{F}_\lambda - F \right\|_2^2 + 2\eta^+ v_1(\lambda) + \hat{\Delta}(\lambda) \right\}. \end{aligned} \quad (31)$$

where

$$\hat{\Delta}(\lambda) := -2\delta_1(\lambda) + \delta_4(\lambda).$$

Inequality (31) implies an oracle inequality as soon as  $\hat{\Delta}(\lambda)$  is small compared to  $\left\| \hat{F}_\lambda - F \right\|_2^2$  and  $\eta^-, \eta^+$  are small enough.

### 3.2 Make use of concentration inequalities

Let  $\Omega_x$  denote the same event as in Section 2. From Eq. (40) and (47), since  $\|A_\lambda\| \leq 1$ , we deduce that on  $\Omega_x$

$$\forall \lambda \in \Lambda, \forall \theta > 0, \quad \left| \hat{\Delta}(\lambda) \right| \leq \theta b(\lambda) + 2\theta v_1(\lambda) + (4 + 5\theta^{-1})x\sigma^2. \quad (32)$$

In addition, combining Eq. (3), (39) and (48) with  $\theta = 1/2$ , and  $\|A_\lambda\| \leq 1$ , we have on  $\Omega_x$ ,

$$\forall \lambda \in \Lambda, \quad b(\lambda) + v_2(\lambda) \leq 2 \left\| \hat{F}_\lambda - F \right\|_2^2 + 16x\sigma^2. \quad (33)$$

### 3.3 First result: with a slightly enlarged penalty

Assume in this subsection that  $\sigma^{-2}C \in [1 + (\ln(n))^{-1}; 1 + \eta^+]$  with  $\eta^+ \geq (\ln(n))^{-1}$ . Then, Eq. (31) and (32) with  $\theta = (\ln(n))^{-1}$  imply

$$\left\| \hat{F}_{\hat{\lambda}_{\text{opt}}(C)} - F \right\|_2^2 \leq \frac{1 + (\ln(n))^{-1}}{1 - (\ln(n))^{-1}} \inf_{\lambda \in \Lambda} \left\{ \left\| \hat{F}_\lambda - F \right\|_2^2 + 4\eta^+ v_1(\lambda) \right\} + (9 + 12 \ln(n))x\sigma^2, \quad (34)$$

if  $\ln(n) \geq 5$ .

Taking  $x = \gamma \ln(n)$  with  $\gamma \geq 1$ , then  $\mathbb{P}(\Omega_x) \geq 1 - 8 \text{Card}(\Lambda) n^{-\gamma}$  and Eq. (34) implies Eq. (29) for every  $n \geq C_2 = e^5$ .

### 3.4 Second result: with assumption $(\mathbf{A}'_3)$

Assume in this subsection that  $\sigma^{-2}C \in [1 - \eta^-; 1 + \eta^+]$  with  $0 \leq \eta^-, \eta^+ \leq (\ln(n))^{-1}$ , and that  $(\mathbf{A}'_3)$  holds.

Then, Eq. (32) with  $\theta = (\ln(n))^{-1}$  and Eq. (33) imply

$$\begin{aligned} & \left\| \widehat{F}_{\widehat{\lambda}_{\text{opt}}(C)} - F \right\|_2^2 - 2\eta^- v_1(\widehat{\lambda}_{\text{opt}}(C)) + \widehat{\Delta}(\widehat{\lambda}_{\text{opt}}(C)) \\ & \geq \left( 1 - \frac{10\kappa}{\ln(n)} \right) \left\| \widehat{F}_{\widehat{\lambda}_{\text{opt}}(C)} - F \right\|_2^2 - \left[ \left( 4 + \frac{80\kappa}{\ln(n)} \right) x + 9 \ln(n) \kappa \right] \sigma^2, \end{aligned} \quad (35)$$

and for every  $\lambda \in \Lambda$ ,

$$\begin{aligned} & \left\| \widehat{F}_\lambda - F \right\|_2^2 + 2\eta^+ v_1(\lambda) + \widehat{\Delta}(\lambda) \\ & \leq \left( 1 + \frac{10\kappa}{\ln(n)} \right) \left\| \widehat{F}_\lambda - F \right\|_2^2 + \left[ \left( 4 + \frac{80\kappa}{\ln(n)} \right) x + 9 \ln(n) \kappa \right] \sigma^2. \end{aligned} \quad (36)$$

Combining Eq. (31), (35) and (36), we get that on  $\Omega_x$ ,

$$\left\| \widehat{F}_{\widehat{\lambda}_{\text{opt}}(C)} - F \right\|_2^2 \leq \left( 1 + \frac{40\kappa}{\ln(n)} \right) \left\| \widehat{F}_\lambda - F \right\|_2^2 + 4 \left[ \left( 4 + \frac{80\kappa}{\ln(n)} \right) x + 9 \ln(n) \kappa \right] \sigma^2 \quad (37)$$

if  $\ln(n) \geq 20\kappa$ .

Now, taking  $x = \gamma \ln(n)$  with  $\gamma \geq 1$  in Eq. (37) implies Eq. (30) for every  $n \geq C_3(\kappa)$ .  $\blacksquare$

## 4 Concentration inequalities

The concentration inequalities used for proving Propositions 1 and 2 are proved in this section.

### 4.1 Linear functions of $\varepsilon$

We here prove concentration inequalities for  $\delta_3(\lambda)$  and  $\delta_4(\lambda)$ . Let us first prove a classical result.

**Proposition 3** *Let  $\xi$  be a standard Gaussian vector in  $\mathbb{R}^n$ ,  $\alpha \in \mathbb{R}^n$  and*

$$Z = \langle \xi, \alpha \rangle = \sum_{j=1}^n \alpha_j \xi_j.$$

*Then, for every  $x \geq 0$ ,*

$$\mathbb{P}(|Z| \leq \sqrt{2x} \|\alpha\|_2) \geq 1 - 2e^{-x}. \quad (38)$$

**Proof**  $Z$  is a Lipschitz function of  $\xi$ , with Lipschitz constant  $\|\alpha\|_2$ . Therefore, the Gaussian concentration theorem implies (see for instance Theorem 3.4 in [2]):

$$\forall t \geq 0, \quad \mathbb{P}(|Z| \geq t) \leq 2 \exp \left( -\frac{t^2}{2 \|\alpha\|_2^2} \right).$$

The result follows by taking  $t = \sqrt{2x} \|\alpha\|_2$ .  $\blacksquare$

Now, remark that

$$\delta_3(\lambda) = \langle \sigma^{-1} \varepsilon, 2\sigma A_\lambda^\top (I_n - A_\lambda) F \rangle \quad \text{and} \quad \delta_4(\lambda) = \langle \sigma^{-1} \varepsilon, 2\sigma (I_n - A_\lambda) F \rangle,$$

where  $\sigma^{-1}\varepsilon$  is a standard Gaussian vector. Hence, Proposition 3 shows that for every  $x \geq 0$  and  $\lambda \in \Lambda$ ,

$$\begin{aligned}\mathbb{P}(|\delta_3(\lambda)| \leq 2\sigma\sqrt{x}\|A_\lambda^\top(I_n - A_\lambda)F\|_2) &\geq 1 - 2e^{-x} \\ \mathbb{P}(|\delta_4(\lambda)| \leq 2\sigma\sqrt{x}\|(I_n - A_\lambda)F\|_2) &\geq 1 - 2e^{-x},\end{aligned}$$

which implies that

$$\mathbb{P}(\forall \theta > 0, |\delta_3(\lambda)| \leq \theta^{-1}x\|A_\lambda\|^2\sigma^2 + \theta\|(I_n - A_\lambda)F\|_2^2) \geq 1 - 2e^{-x} \quad (39)$$

$$\mathbb{P}(\forall \theta > 0, |\delta_4(\lambda)| \leq \theta^{-1}x\sigma^2 + \theta\|(I_n - A_\lambda)F\|_2^2) \geq 1 - 2e^{-x}, \quad (40)$$

since  $\forall a, b, \theta > 0, 2ab \leq \theta a^2 + \theta^{-1}b^2$ .

## 4.2 Quadratic functions of $\varepsilon$

We here prove concentration inequalities for  $\delta_2(\lambda)$  and  $\delta_1(\lambda)$ . Let us first prove (recall) a general result.

**Proposition 4** *Let  $\xi$  be a standard Gaussian vector in  $\mathbb{R}^n$ ,  $M$  a real-valued  $n \times n$  matrix and*

$$Z = \|M\xi\|_2^2 - \text{tr}(M^\top M).$$

*Then, for every  $x \geq 0$ ,*

$$\mathbb{P}(\forall \theta > 0, Z \leq \theta \text{tr}(M^\top M) + 2(1 + \theta^{-1})\|M\|^2 x) \geq 1 - e^{-x} \quad (41)$$

$$\mathbb{P}(\forall \theta > 0, Z \geq -\theta \text{tr}(M^\top M) - [2x(\theta^{-1} - 1) + 1 - \theta]\|M\|^2) \geq 1 - e^{-x}. \quad (42)$$

**Proof** Define  $W = \|M\xi\|_2$ , and note that  $\mathbb{E}[W^2] = \text{tr}(M^\top M)$ . Since  $W$  is a Lipschitz function of  $\xi$  with Lipschitz constant  $\|M\|$ , the Gaussian concentration theorem (see for instance Theorem 3.4 in [2]) shows that for every  $x \geq 0$ , an event  $\Omega_x^+$  of probability at least  $1 - \exp(-x)$  exists on which

$$W \leq \mathbb{E}[W] + \sqrt{2x}\|M\|, \quad (43)$$

and an event  $\Omega_x^-$  of probability at least  $1 - \exp(-x)$  exists on which

$$W \geq \mathbb{E}[W] - \sqrt{2x}\|M\|. \quad (44)$$

In addition, Proposition 3.5 in [2] shows that  $\text{var}(W) \leq \|M\|^2$ . Therefore,

$$0 \leq \mathbb{E}[W^2] - (\mathbb{E}[W])^2 = \text{var}(W) \leq \|M\|^2. \quad (45)$$

We now combine Eq. (45) with the two concentration inequalities above for proving the result.

On the one hand, on  $\Omega_x^+$ ,

$$\begin{aligned}W^2 &\leq (\mathbb{E}[W])^2 + 2\mathbb{E}[W]\sqrt{2x}\|M\| + 2x\|M\|^2 \\ &\leq \mathbb{E}[W^2] + 2\sqrt{2x\mathbb{E}[W^2]}\|M\| + 2x\|M\|^2 \\ &\leq (1 + \theta)\mathbb{E}[W^2] + 2(1 + \theta^{-1})x\|M\|^2\end{aligned}$$

for every  $\theta > 0$ , using successively Eq. (45) and that  $\forall a, b, \theta > 0, 2\sqrt{ab} \leq a\theta + b\theta^{-1}$ . This proves Eq. (41).

On the other hand, for every  $x \geq 0$  such that  $x \leq (\mathbb{E}[W^2] - \|M\|^2)/(2\|M\|^2)$ , on  $\Omega_x^-$

$$\begin{aligned}W^2 &\geq \left(\sqrt{\mathbb{E}[W^2] - \|M\|^2} - \sqrt{2x}\|M\|\right)^2 \\ &\geq (1 - \theta)\mathbb{E}[W^2] - [2x(\theta^{-1} - 1) + 1 - \theta]\|M\|^2.\end{aligned} \quad (46)$$

This proves Eq. (42), since the lower bound in Eq. (46) is non-positive if  $x > (\mathbb{E}[W^2] - \|M\|^2)/(2\|M\|^2)$ . ■



Now, remark that if  $B_\lambda$  exists such that  $A_\lambda = B_\lambda^\top B_\lambda$ —as in the kernel ridge regression example for instance, and more generally when  $A_\lambda$  is symmetric real-valued with  $\text{Sp}(A_\lambda) \subset [0, 1]$ —, then

$$\sigma^{-2}\delta_1(\lambda) = \|B_\lambda(\sigma^{-1}\varepsilon)\|_2^2 - \text{tr}(B_\lambda^\top B_\lambda) \quad \text{and} \quad \sigma^{-2}\delta_2(\lambda) = \|A_\lambda(\sigma^{-1}\varepsilon)\|_2^2 - \text{tr}(A_\lambda^\top A_\lambda) .$$

Hence, Proposition 4 shows that for every  $x \geq 0$  and  $\lambda \in \Lambda$ ,

$$\mathbb{P}(\forall \theta > 0, |\delta_1(\lambda)| \leq \theta \sigma^2 \text{tr}(A_\lambda) + 2(1 + \theta^{-1})x \|A_\lambda\| \sigma^2) \geq 1 - 2e^{-x} \quad (47)$$

$$\mathbb{P}(\forall \theta > 0, |\delta_2(\lambda)| \leq \theta \sigma^2 \text{tr}(A_\lambda^\top A_\lambda) + 2(1 + \theta^{-1})x \|A_\lambda\|^2 \sigma^2) \geq 1 - 2e^{-x} , \quad (48)$$

where we used in particular that  $\|B_\lambda\|^2 = \|A_\lambda\|$ .

## 5 Kernel ridge regression example

Finally, let us make some computations that are specific to the kernel ridge regression example.

### 5.1 Explicit formulas for the deterministic terms

Let  $K$  be the  $n \times n$  matrix such that  $K_{i,j} = k(x_i, x_j)$ . Then, the kernel regression estimator with regularization parameter  $\lambda$  is defined by

$$\hat{F}_\lambda = A_\lambda Y \quad \text{with} \quad A_\lambda = K(K + n\lambda I_n)^{-1} .$$

Then,  $A_\lambda$  is symmetric, real-valued (hence diagonalizable by orthogonal matrices) and  $\text{Sp}(A_\lambda) \subset [0, 1]$ .

Let  $(e_j)_{1 \leq j \leq n}$  be the (orthonormal) eigenvectors of  $K$ , with eigenvalues  $(\mu_j)_{1 \leq j \leq n}$ , assuming that  $\mu_1 \geq \mu_2 \geq \dots \geq \mu_n \geq 0$ . We also assume that  $\mu_1 > 0$ , that is,  $K$  is not the null matrix. We can then decompose  $F$  in this basis:  $F = \sum_j f_j e_j$ .

Therefore, in the orthonormal basis  $(e_j)_{1 \leq j \leq n}$ ,  $A_\lambda$  is diagonal with coefficients

$$\left( \frac{\mu_j}{\mu_j + n\lambda} \right)_{1 \leq j \leq n} .$$

Hence,

$$\begin{aligned} \text{tr}(A_\lambda) &= \text{df}(\lambda) = \sum_{j=1}^n \left( \frac{\mu_j}{\mu_j + n\lambda} \right) \\ \text{tr}(A_\lambda^\top A_\lambda) &= \sum_{j=1}^n \left( \frac{\mu_j}{\mu_j + n\lambda} \right)^2 \\ 2 \text{tr}(A_\lambda) - \text{tr}(A_\lambda^\top A_\lambda) &= \sum_{j=1}^n \left[ \frac{2\mu_j}{\mu_j + n\lambda} - \left( \frac{\mu_j}{\mu_j + n\lambda} \right)^2 \right] = \sum_{j=1}^n \left[ \frac{\mu_j(\mu_j + 2n\lambda)}{(\mu_j + n\lambda)^2} \right] \\ b(\lambda) &= \|(A_\lambda - I_n)F\|_2^2 = \sum_{j=1}^n \left( 1 - \frac{\mu_j}{\mu_j + n\lambda} \right)^2 f_j^2 . \end{aligned}$$

Note that  $\text{df}(\lambda)$  and  $\text{tr}(A_\lambda^\top A_\lambda)$  are decreasing functions of  $\lambda$ , as well as  $2 \text{tr}(A_\lambda) - \text{tr}(A_\lambda^\top A_\lambda)$  since each term of the sum is nonincreasing, and at least one is decreasing. On the contrary,  $b(\lambda)$  is a nondecreasing function of  $\lambda$ . Hence,  $\text{tr}(A_\lambda^\top A_\lambda)$  and  $2 \text{tr}(A_\lambda) - \text{tr}(A_\lambda^\top A_\lambda)$  are increasing functions of  $\text{df}(\lambda)$ , and  $b(\lambda)$  is a nonincreasing function of  $\text{df}(\lambda)$ .

### 5.2 Sufficient condition for assumption $(\mathbf{A}_3)$

Assumption  $(\mathbf{A}_3)$  holds in particular when

$$\exists \kappa \geq 1, \forall \lambda \in \Lambda, \quad \text{tr}(A_\lambda) \leq \kappa \text{tr}(A_\lambda^\top A_\lambda) .$$

If the eigenvalues of  $K$  satisfy

$$\exists \alpha, L_1, L_2 > 0, \forall 1 \leq j \leq n, \quad L_1 j^{-\alpha} \leq \mu_j \leq L_2 j^{-\alpha},$$

then, following [3],

$$\begin{aligned} \text{tr}(A_\lambda) &\leq \sum_{j=1}^n \frac{L_2 j^{-\alpha}}{L_2 j^{-\alpha} + n\lambda} = \sum_{j=1}^n \frac{1}{1 + n\lambda L_2^{-1} j^\alpha} \\ &\leq \int_0^\infty \frac{dt}{1 + n\lambda L_2^{-1} t^\alpha} = \left( \frac{L_2}{n\lambda} \right)^{1/\alpha} \int_0^\infty \frac{du}{1 + u^\alpha} \end{aligned}$$

and

$$\begin{aligned} \text{tr}(A_\lambda^\top A_\lambda) &\geq \sum_{j=1}^n \left( \frac{L_1 j^{-\alpha}}{L_1 j^{-\alpha} + n\lambda} \right)^2 = \sum_{j=1}^n \frac{1}{(1 + n\lambda L_1^{-1} j^\alpha)^2} \\ &\geq \int_1^\infty \frac{dt}{(1 + n\lambda L_1^{-1} t^\alpha)^2} = \left( \frac{L_1}{n\lambda} \right)^{1/\alpha} \int_1^\infty \frac{du}{(1 + u^\alpha)^2}. \end{aligned}$$

Therefore,  $(\mathbf{A}_3)$  holds with

$$\kappa = \left( \frac{L_2}{L_1} \right)^{1/\alpha} \int_0^\infty \frac{du}{1 + u^\alpha} \left( \int_1^\infty \frac{du}{(1 + u^\alpha)^2} \right)^{-1}.$$

## References

- [1] Sylvain Arlot and Francis Bach. Data-driven calibration of linear estimators with minimal penalties. In *Advances in Neural Information Processing Systems (NIPS)*, December 2009.
- [2] P. Massart. *Concentration Inequalities and Model Selection*, volume 1896 of *Lecture Notes in Mathematics*. Springer, Berlin, 2007. Lectures from the 33rd Summer School on Probability Theory held in Saint-Flour, July 6–23, 2003, With a foreword by Jean Picard.
- [3] Z. Harchaoui, F. Bach, and E. Moulines. Testing for homogeneity with kernel fisher discriminant analysis, April 2008. oai:hal.archives-ouvertes.fr:hal-00270806.v1.
